# Supplementary material for: Retrospective study of irrational prescribing in French paediatric hospital: prevalence of inappropriate prescription detected by Pediatrics: Omission of Prescription and Inappropriate prescription (POPI) in the emergency unit and in the ambulatory setting
Source: PubMed Central journal article supplement — BMJ Open. 2019 Mar 20;9(3):e019186. doi: 10.1136/bmjopen-2017-019186 (PMC6475152; doi:10.1136/bmjopen-2017-019186), 2019-03-20
Supplement: bmjopen-2017-019186supp001.pdf [file bmjopen-2017-019186supp001.pdf]

**Appendix 1. Description of inclusion/exclusion criteria, data collected and POPI criteria analyzed among the two cohorts**

|                                                        | Hospital                                                                      | Community                                                                     |
|--------------------------------------------------------|-------------------------------------------------------------------------------|-------------------------------------------------------------------------------|
| Inclusion criteria                                     | Patient under 18 years old<br>Patient with one or more medicine prescriptions | Patient under 18 years old<br>Patient with one or more medicine prescriptions |
| Exclusion criterion                                    | Inaccessible medical records for patients                                     | Prescription without any drug prescribed                                      |
| Software extracted                                     | Urqual®                                                                       | Opus®                                                                         |
| Data collected                                         | Age<br>Sex<br>Weight<br>Current diagnosis<br>Number of prescriptions          | Age<br><br>Number of prescriptions<br>Number of drugs per prescription        |
| Number of POPI items analyzed (among the 102 criteria) | 82                                                                            | 28 (items usable for retrospective analysis if no diagnostic available)       |
