# Supplementary material for: Retrospective study of irrational prescribing in French paediatric hospital: prevalence of inappropriate prescription detected by Pediatrics: Omission of Prescription and Inappropriate prescription (POPI) in the emergency unit and in the ambulatory setting
Source: PubMed Central journal article supplement — BMJ Open. 2019 Mar 20;9(3):e019186. doi: 10.1136/bmjopen-2017-019186 (PMC6475152; doi:10.1136/bmjopen-2017-019186), 2019-03-20
Supplement: bmjopen-2017-019186supp002.pdf [file bmjopen-2017-019186supp002.pdf]

**Appendix 2a. Univariate and multivariate analysis to determine factors associated with  
PIM according to POPI criteria**

| <b>Variable</b>                                      | <b>Univariate analysis</b> |                | <b>Multivariate analysis</b> |                |
|------------------------------------------------------|----------------------------|----------------|------------------------------|----------------|
| <b><u>Model 1: Hospital prescription</u></b>         | <i>OR* [CI 95%]</i>        | <i>p-value</i> | <i>OR* [CI 95%]</i>          | <i>p-value</i> |
| <b><i>Sex</i></b>                                    |                            |                |                              |                |
| Male                                                 | 1                          |                |                              |                |
| Female                                               | 1.1 [0.9-1.3]              | 0.3            |                              |                |
| <b><i>Age category</i></b>                           |                            |                |                              |                |
| 0 - 2 years                                          | 2.5 [1.6-3.9]              | 0.0001         | 2.5 [1.6-3.9]                | < 0.001        |
| 2 - 6 years                                          | 4.0 [2.5-6.3]              | < 0.0001       | 4.0 [2.5-6.3]                | < 0.0001       |
| 6 - 12 years                                         | 2.2 [1.4-3.6]              | 0.0016         | 2.2 [1.4-3.6]                | 0.0016         |
| 12 - 18 years                                        | 1                          |                | 1                            |                |
| <b><u>Model 2: Community prescription</u></b>        |                            |                |                              |                |
| <b><i>Age category</i></b>                           |                            |                |                              |                |
| 0 - 2 years                                          | 0.8 [0.6-1.1]              | 0.1            | 0.7 [0.5-1.0]                | 0.06           |
| 2 - 6 years                                          | 2.0 [1.5-2.6]              | < 0.0001       | 1.9 [1.4-2.4]                | < 0.0001       |
| 6 - 12 years                                         | 1.9 [1.5-2.4]              | < 0.0001       | 1.9 [1.5-2.5]                | < 0.0001       |
| 12 - 18 years                                        | 1                          |                | 1                            |                |
| <b><i>Number of medications per prescription</i></b> | 1.4 [1.3-1.6]              | < 0.001        | 1.4 [1.3-1.6]                | < 0.0001       |

*OR: Odds ratio, CI: Confidence intervals.*

**Appendix 2b. Univariate and multivariate analysis to determine factors associated with PPO according to POPI criteria**

| <b>Variable</b>                                      | <b>Univariate analysis p</b> |                | <b>Multivariate analysis</b> |                |
|------------------------------------------------------|------------------------------|----------------|------------------------------|----------------|
|                                                      | <i>OR* [CI 95%]</i>          | <i>p-value</i> | <i>OR* [CI 95%]</i>          | <i>p-value</i> |
| <b><u>Model 1: Hospital prescription</u></b>         |                              |                |                              |                |
| <b><i>Sex</i></b>                                    |                              |                |                              |                |
| Male                                                 | 1                            |                |                              |                |
| Female                                               | 1.1 [0.9 ; 1.3]              | 0.3053         |                              |                |
| <b><i>Age category</i></b>                           |                              |                |                              |                |
| 0 - 2 years                                          | 1.1 [0.7 ; 1.6]              | 0.7703         | 1.1 [0.7 ; 1.6]              | 0.7703         |
| 2 - 6 years                                          | 1.4 [0.9 ; 2.1]              | 0.0761         | 1.4 [0.9 ; 2.1]              | 0.0761         |
| 6 - 12 years                                         | 1.9 [1.3 ; 2.8]              | 0.0015         | 1.9 [1.3 ; 2.8]              | 0.0015         |
| 12 - 18 years                                        | 1                            |                | 1                            |                |
| <b><u>Model 2: Community prescription</u></b>        |                              |                |                              |                |
| <b><i>Age category</i></b>                           |                              |                |                              |                |
| 0 - 2 years                                          | 6.1 [2.9 ; 12.7]             | <0.0001        | 6.1 [2.9 ; 12.9]             | <0.0001        |
| 2 - 6 years                                          | 22.4 [11.4 ; 44.1]           | <0.0001        | 22.4 [11.3 ; 44.3]           | <0.0001        |
| 6 - 12 years                                         | 9.8 [4.9 ; 19.6]             | <0.0001        | 10.2 [5.1 ; 20.7]            | <0.0001        |
| 12 - 18 years                                        | 1                            |                |                              |                |
| <b><i>Number of medications per prescription</i></b> | 1.2 [1.1 ; 1.3]              | <.0001         | 1.2 [1.2 ; 1.4]              | <0.0001        |

*OR: Odds ratio, CI: Confidence intervals.*
